# Supplementary material for: HBO1 catalyzes lysine benzoylation in mammalian cells
Source: PubMed Central journal article supplement (PMC9647509; doi:10.1016/j.isci.2022.105443), 2022-10-26
Supplement: mmc1.pdf [file mmc1.pdf]

**iScience, Volume 25**

**Supplemental information**

**HBO1 catalyzes lysine benzoylation  
in mammalian cells**

**Doudou Tan, Wei Wei, Zhen Han, Xuelian Ren, Cong Yan, Shankang Qi, Xiaohan Song, Y.  
George Zheng, Jiemin Wong, and He Huang**

# **HBO1 Catalyzes Lysine Benzoylation in Mammalian Cells**

DoudouTan<sup>1</sup>, Wei Wei<sup>2</sup>, Zhen Han<sup>3</sup>, Xuelian Ren<sup>1</sup>, Cong Yan<sup>1</sup>, Shankang Qi<sup>1</sup>, Xiaohan Song<sup>1</sup>, Y. George Zheng<sup>3</sup>, Jiemin Wong<sup>2</sup>, He Huang<sup>1,4,5\*</sup>

**<sup>1</sup>Shanghai Institute of Materia Medica, Chinese Academy of Sciences, Shanghai, 201203, China**

<sup>2</sup>Shanghai Key Laboratory of Regulatory Biology, Institute of Biomedical Sciences and School of Life Sciences, East China Normal University, Shanghai 200241, China

<sup>3</sup>Department of Pharmaceutical and Biomedical Sciences, University of Georgia, Athens, GA 30602, USA

<sup>4</sup>University of Chinese Academy of Sciences, Beijing, 100049, China

<sup>5</sup>Lead contact

\*Correspondence: [hhuang@simm.ac.cn](mailto:hhuang@simm.ac.cn)

## Supplemental Figure

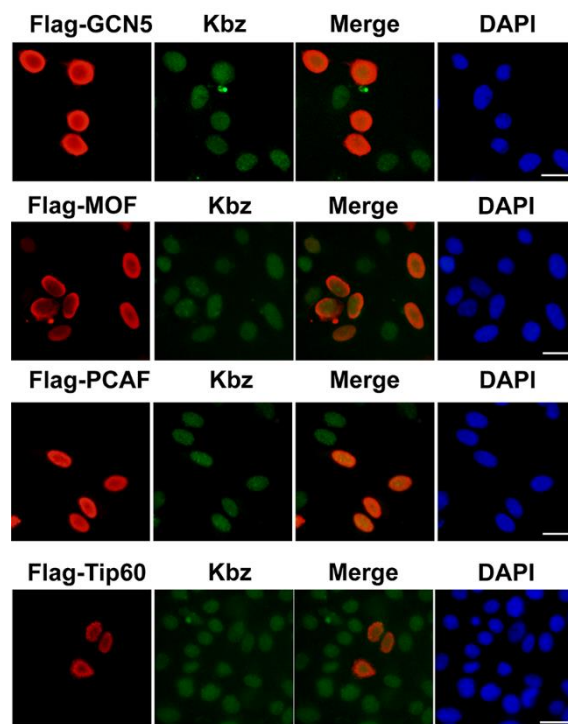

**Figure S1. Related to Figure 2.**

After GCN5, MOF, PCAF, and Tip60 were transfected into HeLa cells, immunofluorescence staining was performed with anti-Kbz antibody. Scale bar = 10  $\mu$ m.
